# Supplementary material for: New powerful reagents based on dihalogen/N,N′-dimethylperhydrodiazepine-2,3-dithione adducts for gold dissolution: the IBr case
Source: Royal Society of Chemistry journal article supplement (doi:10.1039/b210281a), 2003-01-01
Supplement: b210281a.pdf [file b210281a.pdf]

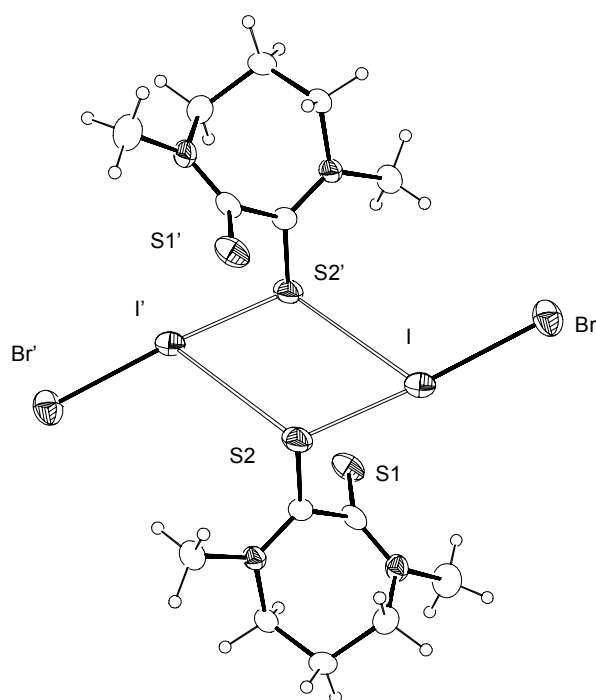

**Fig. S1.** Molecular drawing of the dimeric species  $[1 \cdot IBr]_2$ . The prime denotes the symmetry operator:  $-x + 1, -y, -z + 1$ .
